# Supplementary material
Source: PubMed Central journal article supplement (PMC4198479)

Figure 2 Supplement

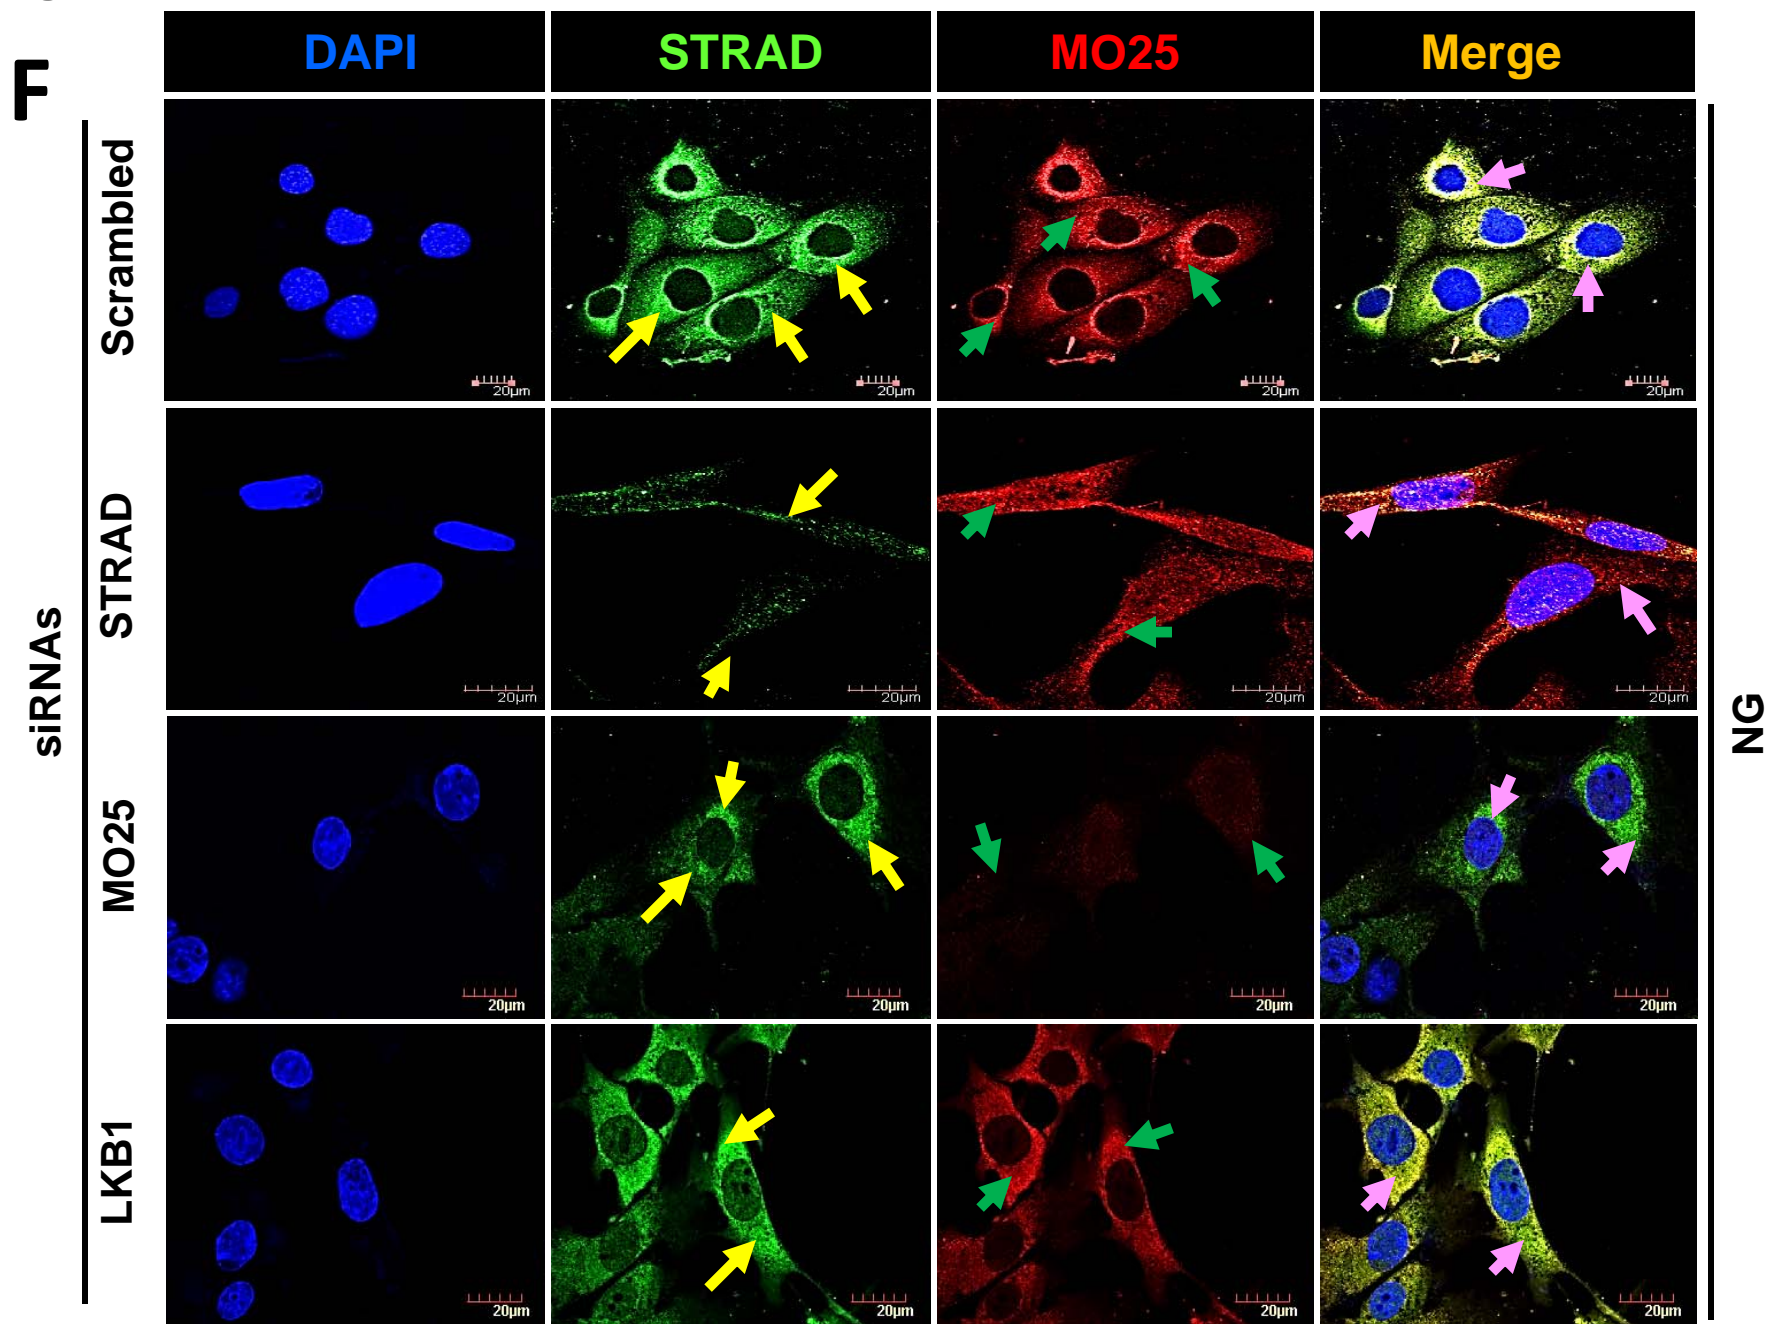

Figure 2 Supplement

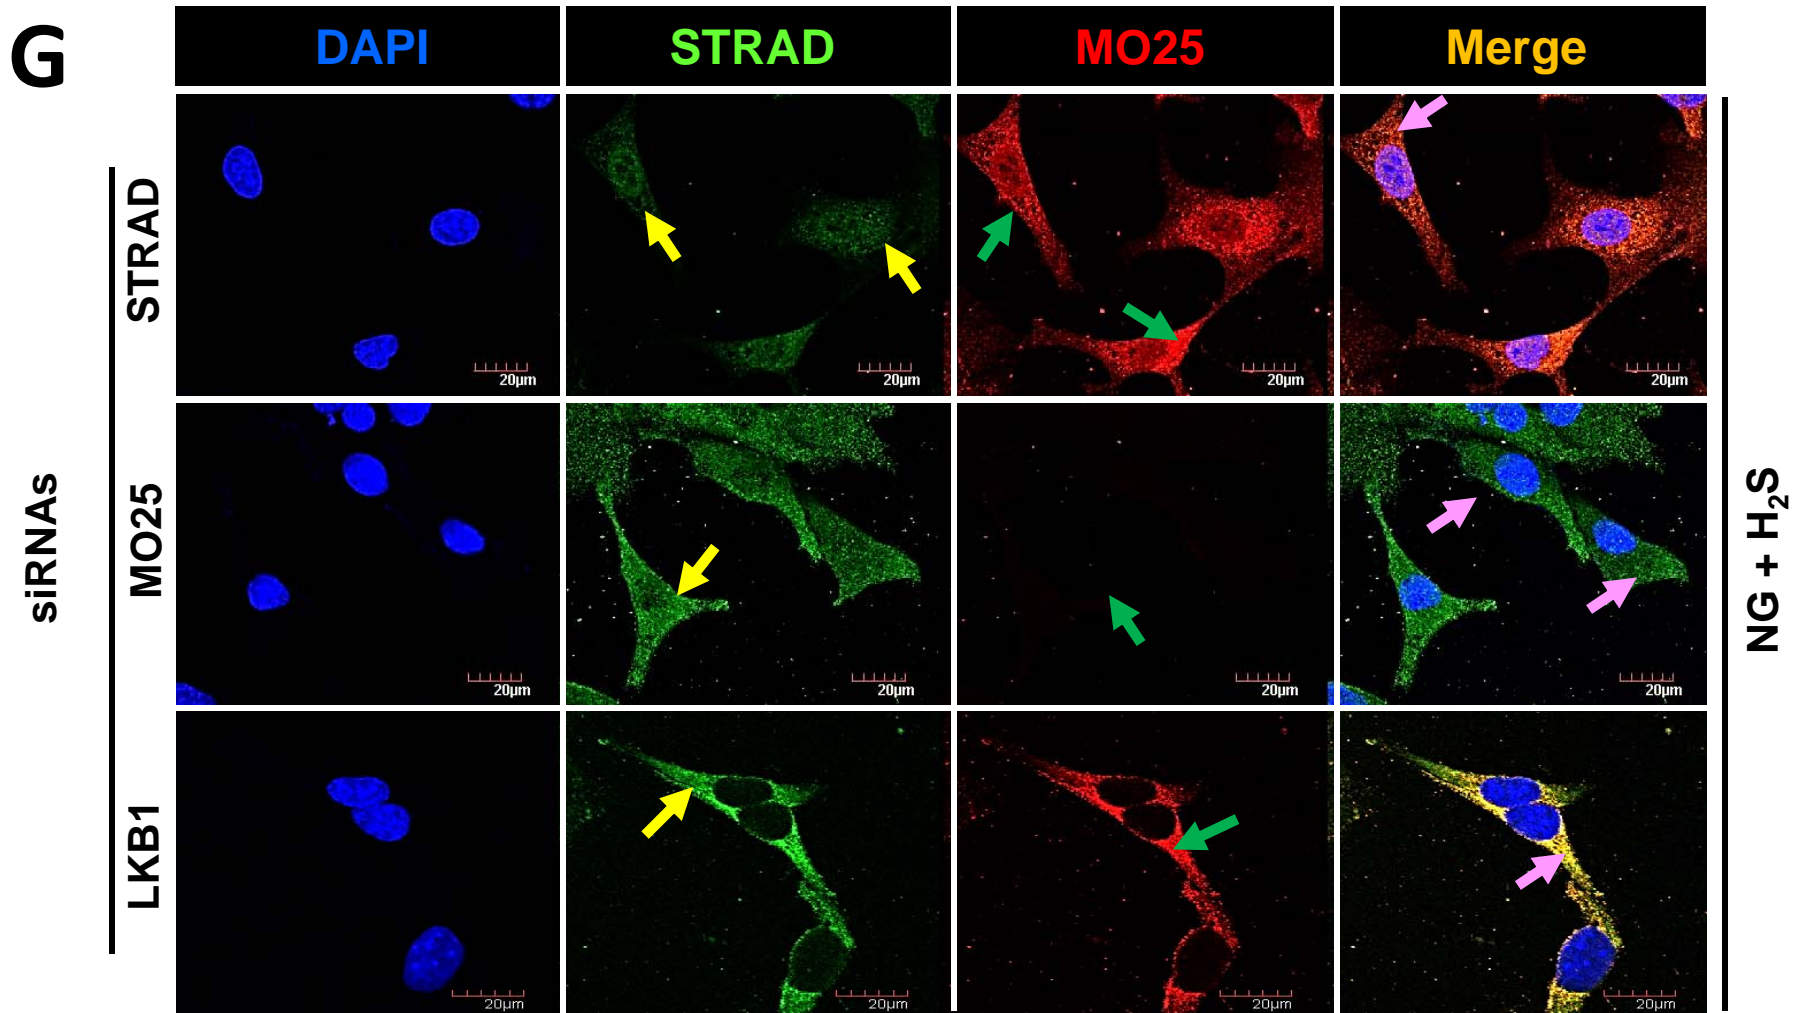

Supplement: NIHMS626864-supplement-1.pdf [file NIHMS626864-supplement-1.pdf]

Figure 4 Supplement

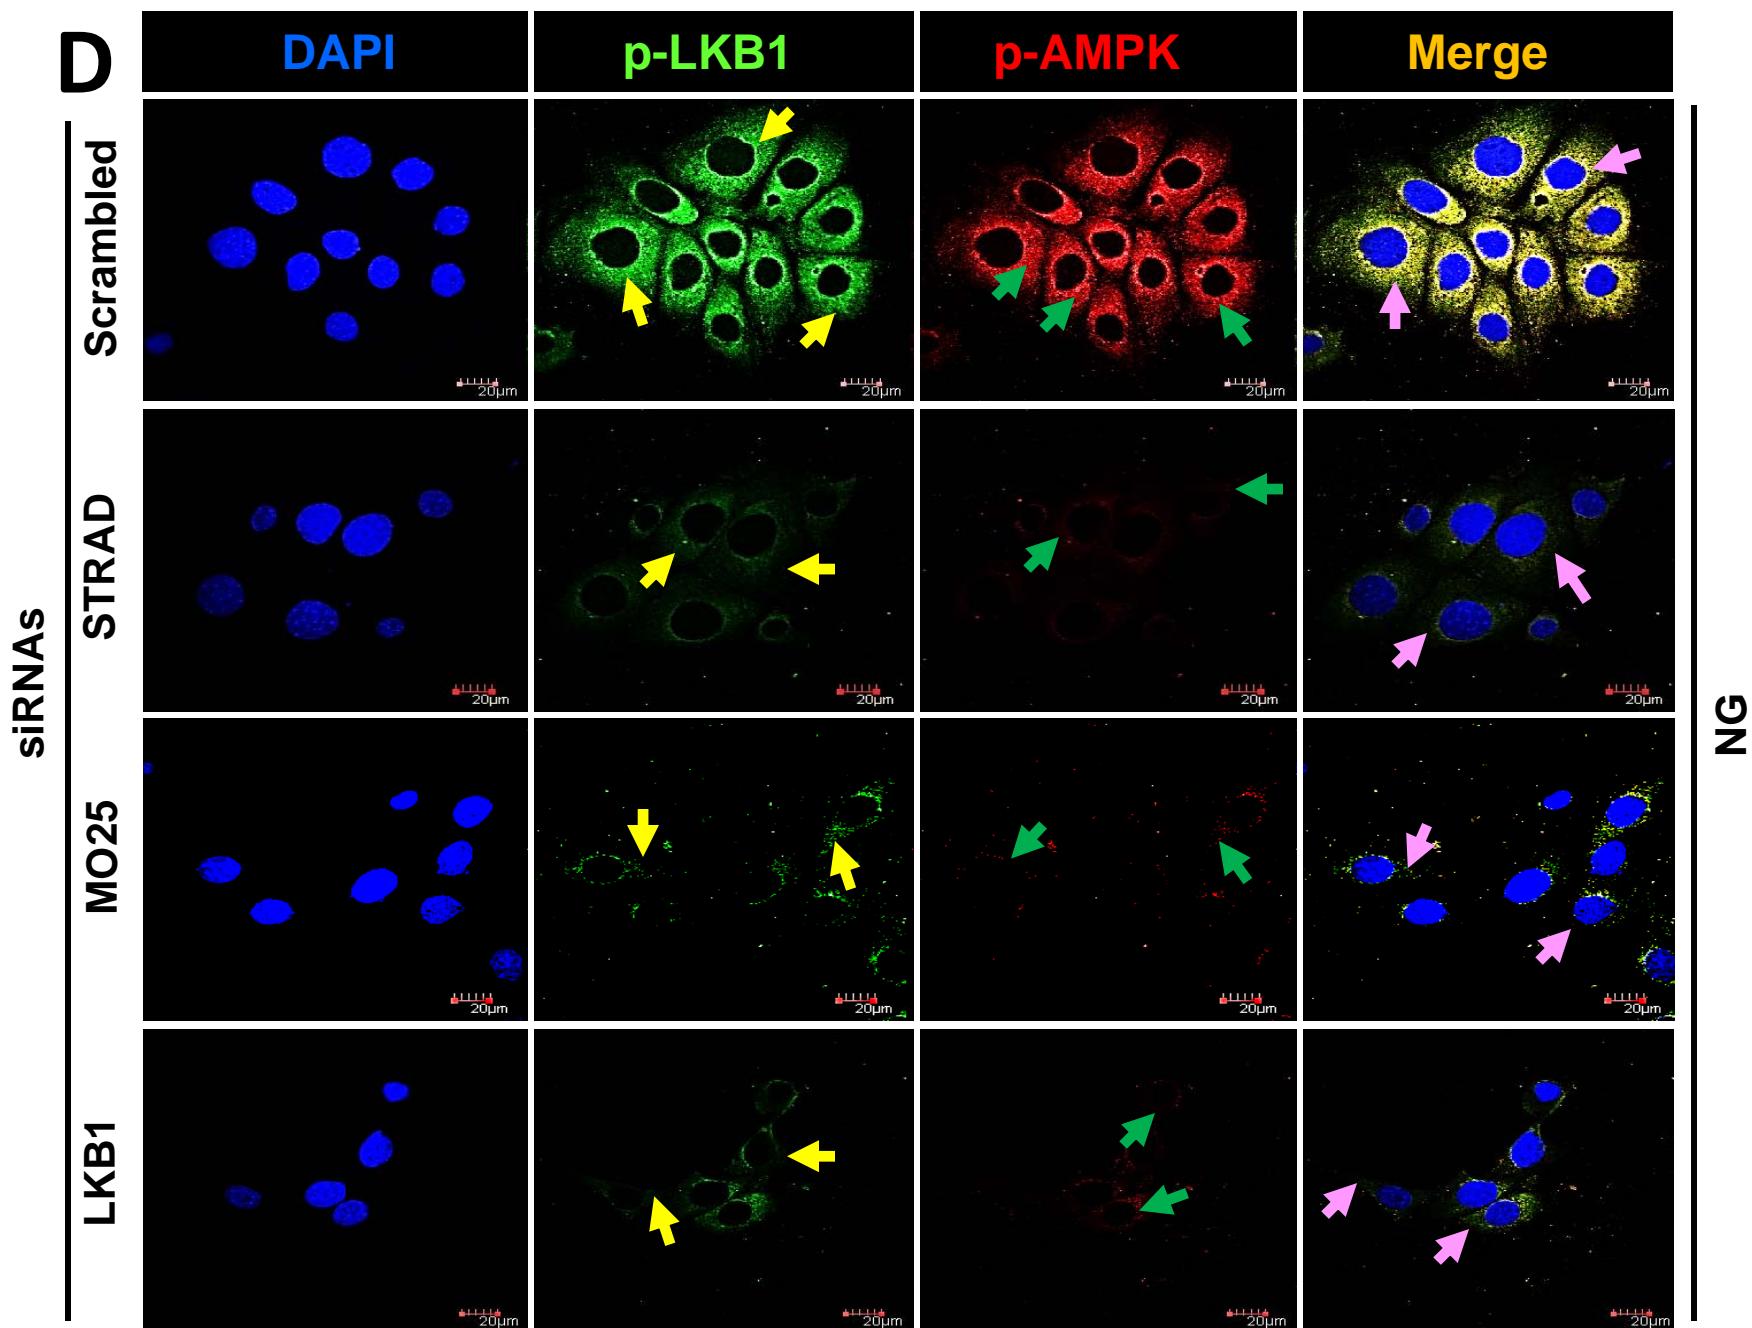

Figure 4 Supplement

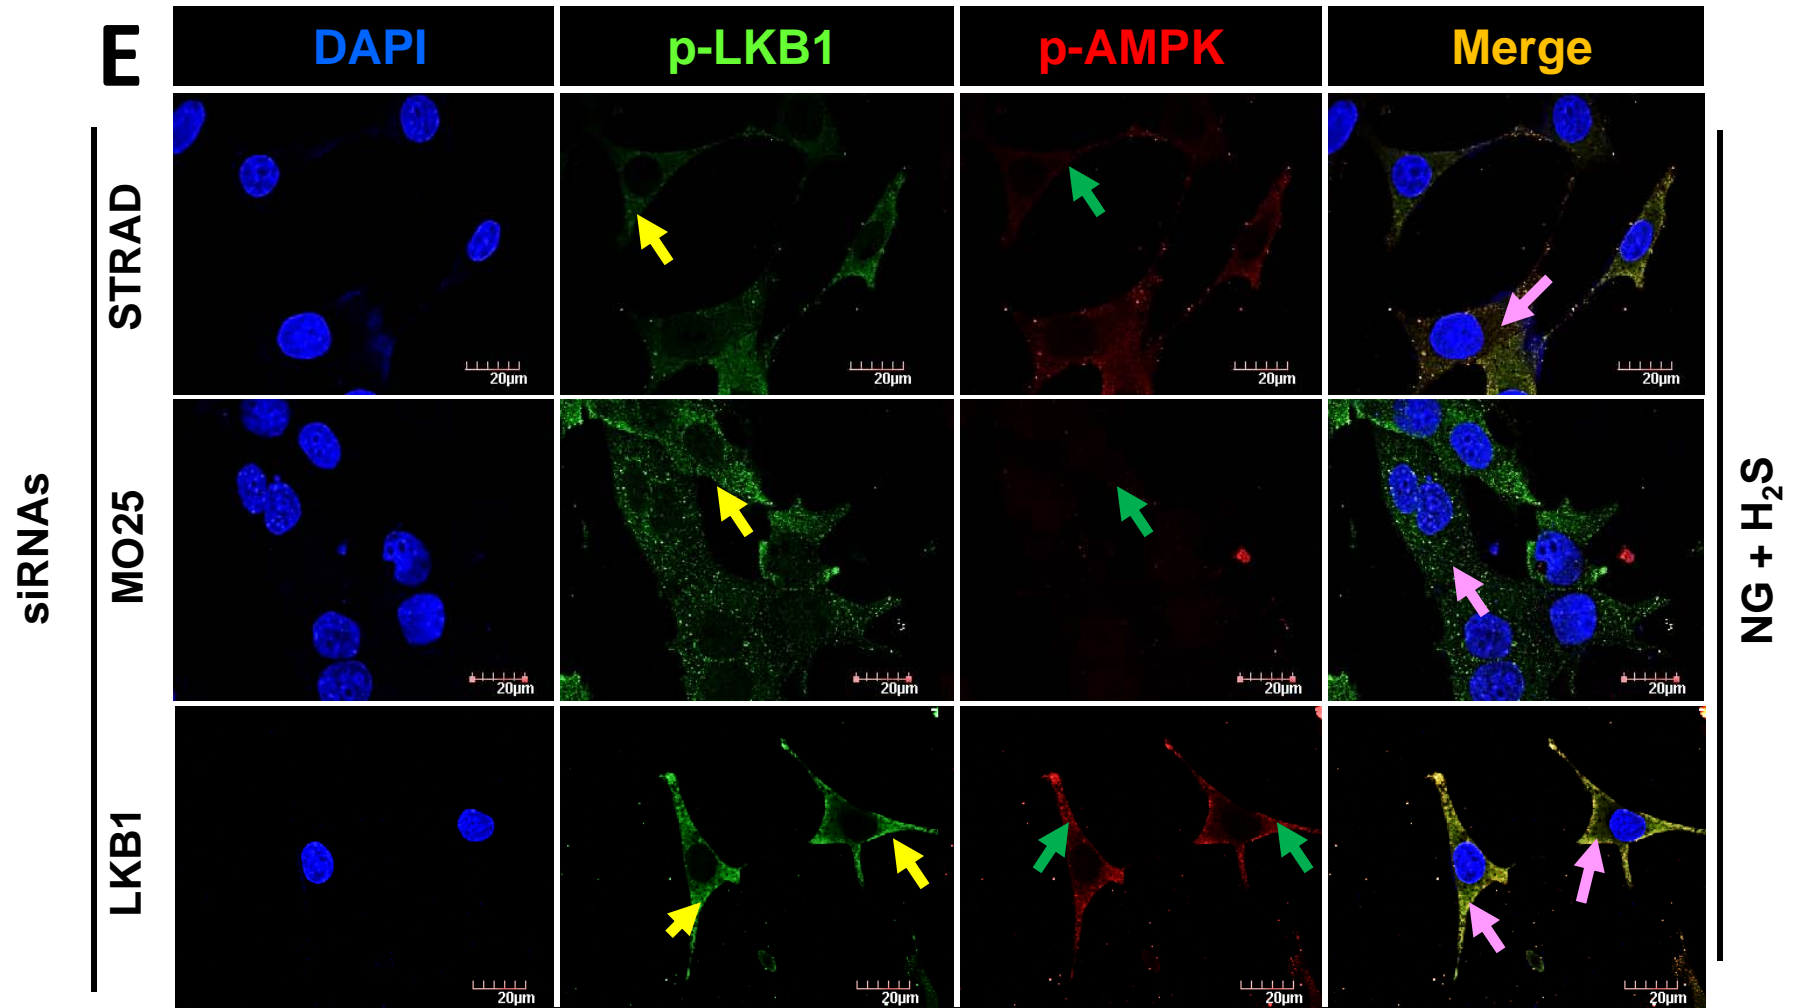

Supplement: NIHMS626864-supplement-2.pdf [file NIHMS626864-supplement-2.pdf]
